# Supplementary material for: Serglycin as a potential biomarker for glioma: association of serglycin expression, extent of mast cell recruitment and glioblastoma progression
Source: PubMed Central journal article supplement (PMC5421891; doi:10.18632/oncotarget.15820), 2017-03-01
Supplement: oncotarget-08-24815-s001.pdf [file oncotarget-08-24815-s001.pdf]

## Serglycin as a potential biomarker for glioma: association of serglycin expression, extent of mast cell recruitment and glioblastoma progression

### Supplementary Materials

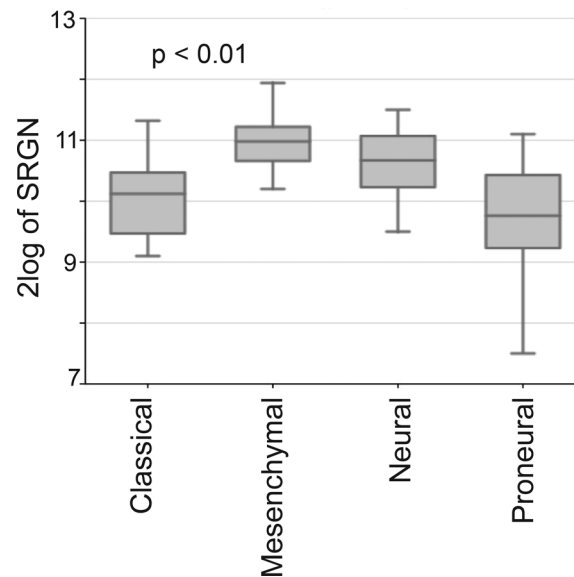

**Supplementary Figure 1: Expression levels of SRGN in the four GBM subtypes show significant variation.** Clinical data for the patients are from the TCGA portal and the analysis is done on the R2 genomic analysis platform. Difference in expression between groups was analysed using ANOVA.  $p < 0.01$ .

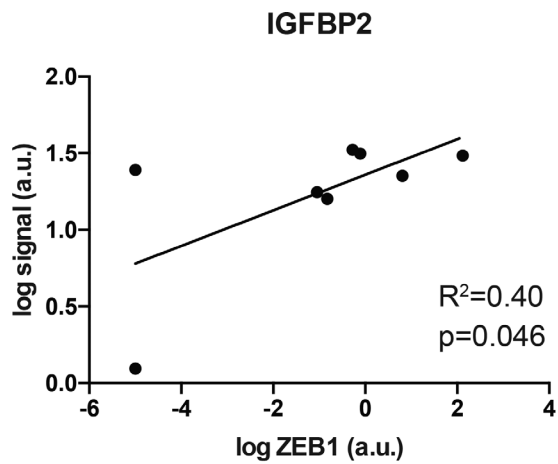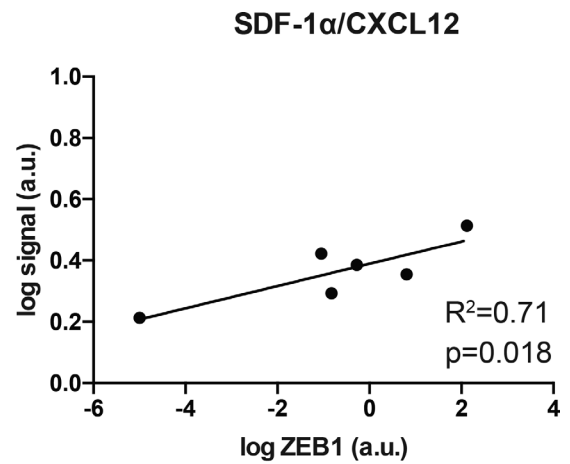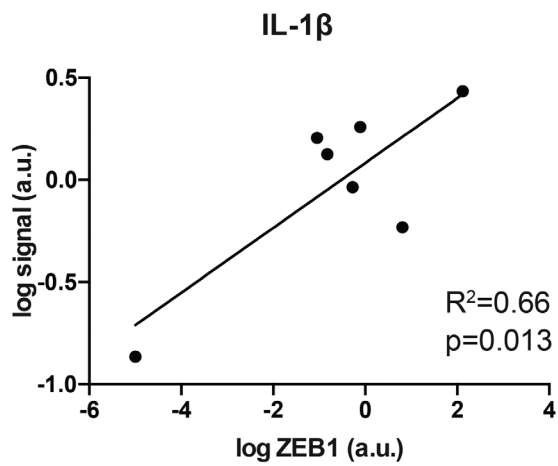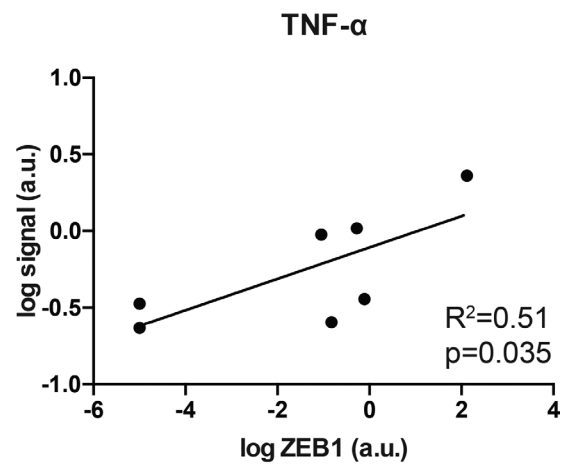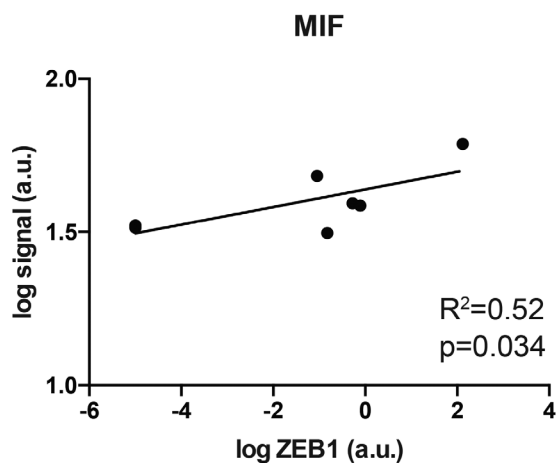

Supplementary Figure 2: Analysis of GBM patient tumor specimens demonstrated that levels of pro-inflammatory cytokine SDF-1 $\alpha$  (CXCL 12), IGFBP2, IL-1 $\beta$ , TNF- $\alpha$  and MIF correlate significantly with ZEB1.

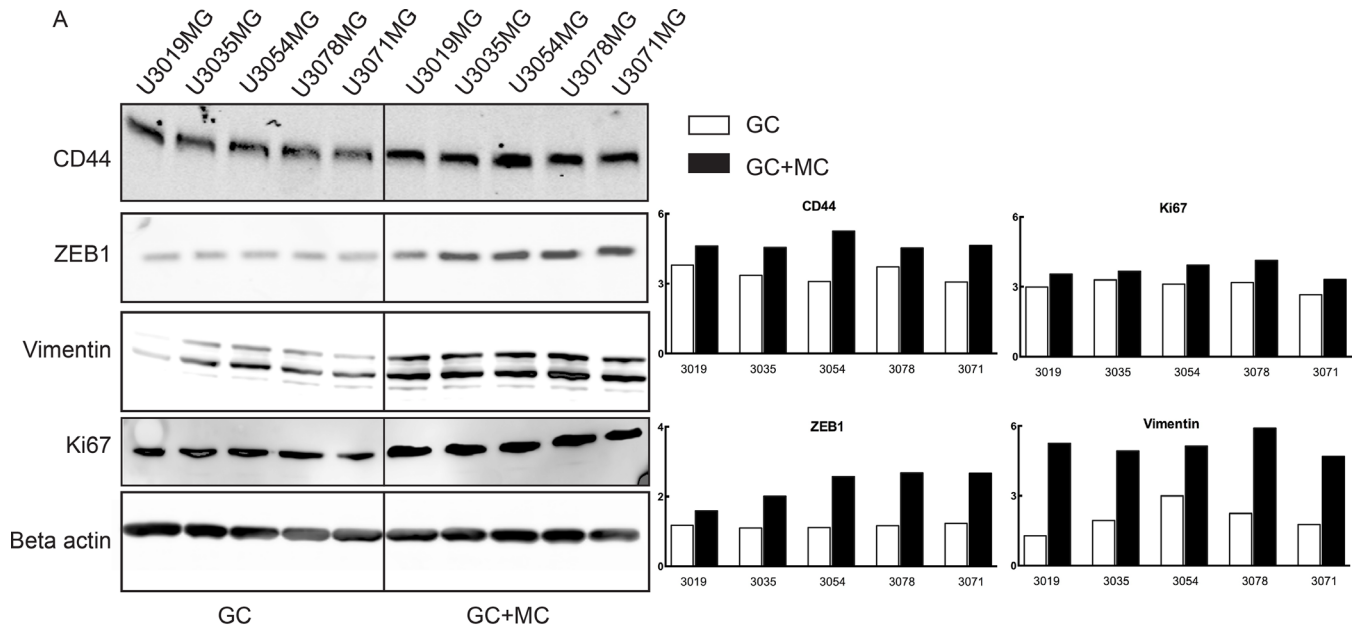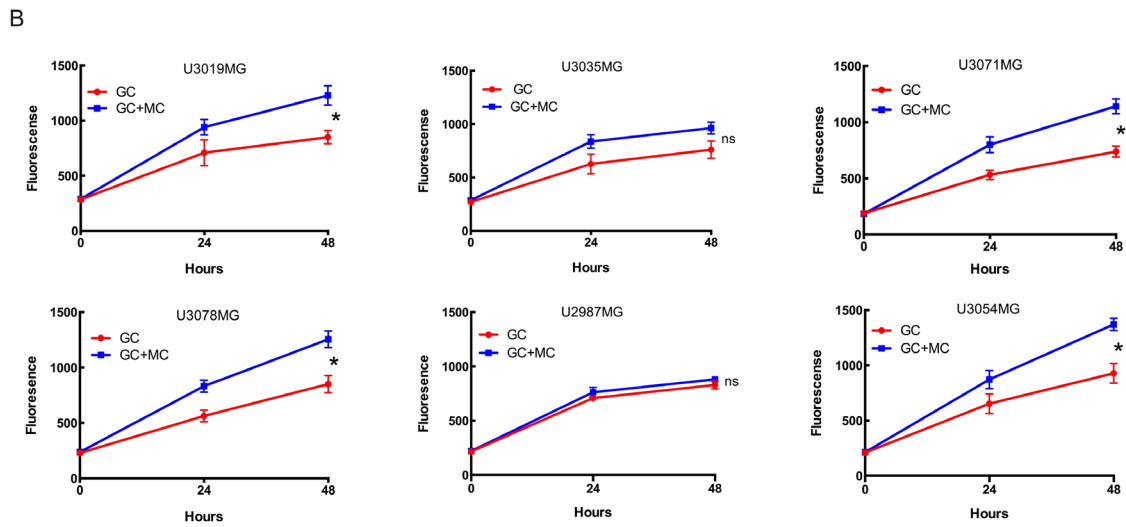

**Supplementary Figure 3:** (A) Western blot analysis showing expression levels of beta actin, Ki67, vimentin, ZEB1 and CD44 in the glioma cells before and after co-culture (B) CyQuant NF cell proliferation assay performed with the glioma cell lines grown alone or in co-culture with LAD2 cells. GC = glioma cells, GC + MC = glioma cells co-cultured with LAD2 cells. \* $p < 0.05$ .
